# Supplementary material for: Analysis of Airborne Fungal Communities on Pedestrian Bridges in Urban Environments
Source: MDPI journal article supplement (doi:10.3390/microorganisms11082097), 2023-08-16
Supplement: s1 [file s1]

# Analysis of Airborne Fungal Communities on Pedestrian Bridges in Urban Environments

Amran A. Q. A. Al-Shaarani, Ziwei M. Quach, Xiao Wang <sup>†</sup>, Mohammed H. M. Muafa, Md M. H. Nafis and Lorenzo Pecoraro <sup>\*</sup>

School of Pharmaceutical Science and Technology, Tianjin University, 92 Weijin Road, Tianjin 300072, China; amran303@163.com (A.A.Q.A.A.-S.); ziweimelaniequach@tju.edu.cn (Z.M.Q.); wang\_xiao1996@163.com (X.W.); muafa99@tju.edu.cn (M.H.M.M.); mh.nafis29oct@gmail.com (M.M.H.N.)

<sup>\*</sup> Correspondence: lorenzo.pecoraro@tju.edu.cn; Tel.: +86-185-2082-4550

<sup>†</sup> Current address: Department of Ocean Science, The Hong Kong University of Science and Technology, Hong Kong SAR, China.

## Supplementary information

Supplementary Table S1. Details of the selected sampling sites.

| Weijin road pedestrian bridge (WJR)                            |           |             |
|----------------------------------------------------------------|-----------|-------------|
| Sampling site                                                  | GPS       |             |
| Top [center of the bridge (C)]                                 | 39°6'10"N | 117°10'22"E |
| Down [under the bridge (U)]                                    | 39°6'10"N | 117°10'22"E |
| Tianjin university old campus Northgate pedestrian bridge (NG) |           |             |
| Sampling site                                                  | GPS       |             |
| Top [center of the bridge (C)]                                 | 39°6'35"N | 117°10'7"E  |
| Down [under the bridge (U)]                                    | 39°6'30"N | 117°10'11"E |
| Binjiangdao pedestrian bridge (BJD)                            |           |             |
| Sampling site                                                  | GPS       |             |
| Top [center of the bridge (C)]                                 | 39°7'30"N | 117°11'14"E |
| Down [under the bridge (U)]                                    | 39°7'30"N | 117°11'13"E |
| Nanmenwai avenue pedestrian bridge (NMWA)                      |           |             |
| Sampling site                                                  | GPS       |             |
| Top [center of the bridge (C)]                                 | 39°7'35"N | 117°10'26"E |
| Down [under the bridge (U)]                                    | 39°7'35"N | 117°10'25"E |
| Wujiayao avenue pedestrian bridge (WJY)                        |           |             |
| Sampling site                                                  | GPS       |             |
| Top [center of the bridge (C)]                                 | 39°5'58"N | 117°10'56"E |
| Down [under the bridge (U)]                                    | 39°5'58"N | 117°10'57"E |

**Supplementary Table S2:** Airborne fungal diversity molecularly detected in the five studied pedestrian bridges, from DNA extracted from isolated strains.

| Sample No. | Sampling week        | Sampling site | GenBank  | Best BLAST match(es)                | Accession code | Overlap length | Query curve | Match % |
|------------|----------------------|---------------|----------|-------------------------------------|----------------|----------------|-------------|---------|
| 1          | 1 <sup>st</sup> week | NMWA (UN)     | ON705346 | <i>Penicillium</i> sp.              | MN634686.1     | 539            | 94%         | 99.63%  |
|            |                      |               |          | <i>Penicillium thomii</i>           | MG818940.1     | 551            | 95%         | 99.63%  |
| 2          | 1 <sup>st</sup> week | NMWA (UN)     | ON705347 | <i>Alternaria</i> sp.               | MT735240.1     | 597            | 96%         | 100.00% |
|            |                      |               |          | <i>Alternaria alternata</i>         | MN594810.1     | 598            | 93%         | 99.81%  |
| 3          | 1 <sup>st</sup> week | NMWA (UN)     | ON705348 | <i>Arthrinium</i> sp.               | KJ361492.1     | 589            | 93%         | 100.00% |
|            |                      |               |          | <i>Arthrinium arundinis</i>         | LT719147.1     | 1070           | 93%         | 99.62%  |
| 4          | 1 <sup>st</sup> week | NMWA (UN)     | ON705349 | <i>Alternaria alternata</i>         | MW009041.1     | 542            | 94%         | 100.00% |
| 5          | 1 <sup>st</sup> week | NMWA (UN)     | ON705350 | <i>Aspergillus sydowii</i>          | MT582755.1     | 627            | 100%        | 99.07%  |
| 6          | 1 <sup>st</sup> week | NMWA (UN)     | ON705351 | <i>Sporobolomyces beijingsensis</i> | MK592821.1     | 560            | 94%         | 99.82%  |
| 7          | 1 <sup>st</sup> week | NG (UN)       | ON705352 | <i>Sporobolomyces beijingsensis</i> | ON705352.1     | 676            | 100%        | 100.00% |
| 8          | 1 <sup>st</sup> week | NG (UN)       | ON705353 | <i>Sporidiobolus pararoseus</i>     | MN956990.1     | 586            | 100%        | 100.00% |
| 9          | 1 <sup>st</sup> week | WJR (C)       | ON705354 | <i>Keissleriella</i> sp.            | ON705354.1     | 560            | 100%        | 100.00% |
|            |                      |               |          | <i>Keissleriella caraganae</i>      | NR_164447.1    | 522            | 89%         | 98.81%  |
| 10         | 1 <sup>st</sup> week | WJR (C)       | ON705355 | <i>Lophiostoma corticola</i>        | ON705355.1     | 568            | 100%        | 100.00% |
| 11         | 1 <sup>st</sup> week | WJR (C)       | ON705356 | <i>Coprinellus radians</i>          | MK087751.1     | 729            | 91%         | 99.84%  |
| 12         | 1 <sup>st</sup> week | WJR (C)       | ON705360 | <i>Bipolaris setariae</i>           | HE792936.1     | 575            | 93%         | 99.82%  |
| 13         | 1 <sup>st</sup> week | WJR (C)       | ON705361 | Dothideomycetes sp.                 | JQ759885.1     | 1080           | 100%        | 100.00% |
|            |                      |               |          | <i>Periconia</i> sp.                | MW391746.1     | 540            | 91%         | 99.60%  |
| 14         | 1 <sup>st</sup> week | NG (C)        | ON705362 | <i>Aspergillus versicolor</i>       | KX349474.1     | 545            | 93%         | 99.81%  |
| 15         | 1 <sup>st</sup> week | NG (C)        | ON705360 | <i>Didymella glomerata</i>          | MH791089.1     | 521            | 93%         | 99.03%  |
| 16         | 1 <sup>st</sup> week | NG (C)        | ON705361 | Ascomycota sp.                      | JN120374.1     | 1094           | 95%         | 93.39%  |
|            |                      |               |          | <i>Paraphoma fimeti</i>             | MW221097.1     | 574            | 87%         | 92.46%  |
| 17         | 1 <sup>st</sup> week | NG (C)        | ON705362 | <i>Aspergillus</i> sp.              | KF964033.1     | 541            | 95%         | 99.62%  |
| 18         | 1 <sup>st</sup> week | NG (C)        | ON705363 | <i>Phoma fungicola</i>              | KF293780.1     | 515            | 95%         | 99.81%  |
| 19         | 1 <sup>st</sup> week | NG (C)        | ON705364 | <i>Aspergillus sydowii</i>          | MH712267.1     | 565            | 95%         | 99.44%  |
| 20         | 1 <sup>st</sup> week | NG (C)        | ON705365 | <i>Aspergillus sydowii</i>          | JX518253.1     | 540            | 96%         | 99.08%  |
| 21         | 1 <sup>st</sup> week | WJY (UN)      | ON705366 | <i>Didymella</i> sp.                | MG198901.1     | 534            | 100%        | 100.00% |
|            |                      |               |          | <i>Didymella glomerata</i>          | ON705360.1     | 547            | 96%         | 99.22%  |
| 22         | 1 <sup>st</sup> week | WJY (UN)      | ON705367 | <i>Rhizopus oryzae</i>              | MK246921.1     | 602            | 99%         | 99.66%  |
| 23         | 1 <sup>st</sup> week | WJY (UN)      | ON705368 | <i>Cladosporium halotolerans</i>    | MT588810.1     | 575            | 93%         | 99.60%  |
| 24         | 1 <sup>st</sup> week | WJY (UN)      | ON705369 | <i>Scopulariopsis brevicaulis</i>   | MF044048.1     | 580            | 96%         | 97.06%  |
| 25         | 1 <sup>st</sup> week | WJY (UN)      | ON705370 | <i>Cladosporium cladosporioides</i> | KU645993.1     | 561            | 95%         | 94.74%  |
| 26         | 1 <sup>st</sup> week | WJY (UN)      | ON705371 | <i>Penicillium brevicompactum</i>   | KX067822.1     | 1046           | 95%         | 99.64%  |
| 27         | 1 <sup>st</sup> week | BJD (UN)      | ON705372 | <i>Cladosporium cladosporioides</i> | MW113324.1     | 523            | 96%         | 99.23%  |

|    |                      |          |          |                                    |             |      |      |         |
|----|----------------------|----------|----------|------------------------------------|-------------|------|------|---------|
| 28 | 1 <sup>st</sup> week | BJD (UN) | ON705373 | <i>Alternaria compacta</i>         | MW009019.1  | 553  | 98%  | 99.81%  |
| 29 | 1 <sup>st</sup> week | BJD (UN) | ON705374 | <i>Aspergillus flocculosus</i>     | MH101466.1  | 796  | 96%  | 99.13%  |
| 30 | 1 <sup>st</sup> week | BJD (UN) | ON705375 | <i>Cladosporium tenuissimum</i>    | MH270558.1  | 516  | 94%  | 100.00% |
| 31 | 1 <sup>st</sup> week | BJD (C)  | ON705376 | <i>Trichoderma</i> sp.             | MK870316.1  | 581  | 98%  | 99.65%  |
| 32 | 1 <sup>st</sup> week | BJD (C)  | ON705377 | <i>Trichoderma</i> sp.             | MK871149.1  | 580  | 98%  | 99.48%  |
| 33 | 1 <sup>st</sup> week | BJD (C)  | ON705378 | <i>Alternaria tenuissima</i>       | MZ160946.1  | 588  | 98%  | 99.45%  |
| 34 | 1 <sup>st</sup> week | BJD (C)  | ON705379 | <i>Alternaria tamaricis</i>        | MW449616.1  | 539  | 97%  | 99.81%  |
| 35 | 1 <sup>st</sup> week | BJD (C)  | ON705380 | <i>Alternaria alternata</i>        | MW009000.1  | 553  | 98%  | 99.45%  |
| 36 | 1 <sup>st</sup> week | BJD (C)  | ON705381 | <i>Alternaria tenuissima</i>       | MZ160951.1  | 539  | 96%  | 99.81%  |
| 37 | 1 <sup>st</sup> week | BJD (C)  | ON705382 | <i>Chaetomium cruentum</i>         | JN209871.1  | 1140 | 98%  | 98.57%  |
| 38 | 1 <sup>st</sup> week | BJD (C)  | ON705383 | <i>Trichoderma viride</i>          | HM037928.1  | 581  | 97%  | 99.29%  |
| 39 | 1 <sup>st</sup> week | WJY (C)  | ON705384 | <i>Moesziomyces bullatus</i>       | MK024203.1  | 755  | 99%  | 99.45%  |
| 40 | 1 <sup>st</sup> week | NMWA (C) | ON705385 | <i>Choanephora infundibulifera</i> | MH856792.1  | 635  | 94%  | 99.33%  |
| 41 | 1 <sup>st</sup> week | WJR (UN) | ON705386 | <i>Alternaria alternata</i>        | MT487774.1  | 551  | 94%  | 99.81%  |
| 42 | 2 <sup>nd</sup> week | BJD (UN) | ON705387 | Pleosporales sp.                   | MT974576.1  | 569  | 92%  | 99.10%  |
| 43 | 2 <sup>nd</sup> week | BJD (UN) | ON705388 | <i>Filobasidium magnum</i>         | MK592828.1  | 596  | 92%  | 99.66%  |
| 44 | 2 <sup>nd</sup> week | BJD(UN)  | ON705389 | <i>Sporidiobolus pararoseus</i>    | MN956990.1  | 1156 | 88%  | 99.64%  |
| 45 | 2 <sup>nd</sup> week | BJD (UN) | ON705390 | <i>Schizophyllum</i> sp.           | MK732120.1  | 633  | 83%  | 98.32%  |
|    |                      |          |          | <i>Schizophyllum commune</i>       | MK680083.1  | 680  | 83%  | 98.31%  |
| 46 | 2 <sup>nd</sup> week | BJD (UN) | ON705391 | <i>Sporidiobolus ruineniae</i>     | HQ670680.1  | 609  | 90%  | 97.88%  |
| 47 | 2 <sup>nd</sup> week | BJD (UN) | ON705392 | <i>Schizophyllum commune</i>       | MF061788.1  | 606  | 100% | 99.18%  |
| 48 | 2 <sup>nd</sup> week | BJD (UN) | ON705393 | <i>Alternaria tenuissima</i>       | MW723827.1  | 551  | 92%  | 93.20%  |
| 49 | 2 <sup>nd</sup> week | WJR (C)  | ON705394 | <i>Sporobolomyces beijngensis</i>  | NR_137663.1 | 638  | 97%  | 99.64%  |
| 50 | 2 <sup>nd</sup> week | WJR (C)  | ON705395 | <i>Schizophyllum commune</i>       | MF061788.1  | 606  | 99%  | 99.83%  |
| 51 | 2 <sup>nd</sup> week | WJR (C)  | ON705396 | <i>Keissleriella</i> sp.           | MW764302.1  | 543  | 96%  | 99.44%  |
| 52 | 2 <sup>nd</sup> week | WJR (C)  | ON705397 | <i>Schizophyllum commune</i>       | KU042974.1  | 614  | 93%  | 98.63%  |
| 53 | 2 <sup>nd</sup> week | BJD (C)  | ON705398 | <i>Hannaella oryzae</i>            | KY103504.1  | 646  | 98%  | 99.13%  |
| 54 | 2 <sup>nd</sup> week | BJD (C)  | ON705399 | <i>Sporidiobolus pararoseus</i>    | MN956990.1  | 1156 | 95%  | 99.82%  |
| 55 | 2 <sup>nd</sup> week | BJD (C)  | ON705400 | <i>Coprinellus radians</i>         | MK732139.1  | 672  | 92%  | 98.83%  |
| 56 | 2 <sup>nd</sup> week | BJD (C)  | ON705401 | <i>Sporobolomyces carnicolor</i>   | MT529926.1  | 608  | 93%  | 94.30%  |
| 57 | 2 <sup>nd</sup> week | BJD (C)  | ON705402 | <i>Hannaella oryzae</i>            | KY103504.1  | 646  | 68%  | 92.58%  |
| 58 | 2 <sup>nd</sup> week | NG (C)   | ON705403 | <i>Alternaria tenuissima</i>       | MW723827.1  | 551  | 89%  | 97.09%  |
| 59 | 2 <sup>nd</sup> week | NG (C)   | ON705404 | <i>Sporobolomyces carnicolor</i>   | MK592826.1  | 571  | 97%  | 98.39%  |
| 60 | 2 <sup>nd</sup> week | NG (C)   | ON705405 | <i>Schizophyllum commune</i>       | HQ331059.1  | 597  | 75%  | 98.93%  |
| 61 | 2 <sup>nd</sup> week | NG (C)   | ON705406 | <i>Irpex lacteus</i>               | KX958063.1  | 1691 | 97%  | 99.06%  |
| 62 | 2 <sup>nd</sup> week | NG (C)   | ON705407 | <i>Coprinellus radians</i>         | KP900252.1  | 658  | 99%  | 96.49%  |
| 63 | 2 <sup>nd</sup> week | NG (C)   | ON705408 | <i>Schizophyllum</i> sp.           | MZ501801.1  | 600  | 95%  | 99.66%  |
|    |                      |          |          | <i>Schizophyllum commune</i>       | MN218205.1  | 639  | 95%  | 99.49%  |

|    |                      |          |          |                                       |            |      |      |         |
|----|----------------------|----------|----------|---------------------------------------|------------|------|------|---------|
| 64 | 2 <sup>nd</sup> week | WJY (C)  | ON705409 | <i>Hypocreales</i> sp.                | MN856379.1 | 545  | 93%  | 95.59%  |
| 65 | 2 <sup>nd</sup> week | WJY (C)  | ON705410 | <i>Sporobolomyces beijingsensis</i>   | MK592821.1 | 560  | 86%  | 93.36%  |
| 66 | 2 <sup>nd</sup> week | WJY (C)  | ON705411 | <i>Sporidiobolus pararoseus</i>       | MN956990.1 | 1156 | 95%  | 99.64%  |
| 67 | 2 <sup>nd</sup> week | WJY (C)  | ON705412 | <i>Sporidiobolus pararoseus</i>       | ON705412.1 | 622  | 100% | 100.0%  |
| 68 | 2 <sup>nd</sup> week | WJY (C)  | ON705413 | <i>Typhula micans</i>                 | ON705413.1 | 129  | 100% | 100.0%  |
| 69 | 2 <sup>nd</sup> week | WJY (C)  | ON705414 | Pleosporales sp.                      | MK595645.1 | 723  | 96%  | 99.60%  |
|    |                      |          |          | <i>Parastagonospora nodorum</i>       | KF512822.1 | 1034 | 96%  | 99.60%  |
| 70 | 2 <sup>nd</sup> week | WJY (C)  | ON705415 | <i>Botryosporium</i> sp.              | MH428684.1 | 479  | 78%  | 89.94%  |
|    |                      |          |          | <i>Botryosporium longibrachiatum</i>  | KF372591.1 | 604  | 88%  | 91.96%  |
| 71 | 2 <sup>nd</sup> week | WJY (C)  | ON705416 | <i>Hannaella oryzae</i>               | KY103504.1 | 646  | 96%  | 99.12%  |
| 72 | 2 <sup>nd</sup> week | WJY (C)  | ON705417 | <i>Sporobolomyces carnicolor</i>      | MT529870.1 | 557  | 98%  | 99.64%  |
| 73 | 2 <sup>nd</sup> week | WJY (C)  | ON705418 | <i>Hannaella oryzae</i>               | KY103504.1 | 646  | 96%  | 97.60%  |
| 74 | 2 <sup>nd</sup> week | WJY (C)  | ON705419 | Basidiomycota sp.                     | MF680430.1 | 628  | 95%  | 99.84%  |
|    |                      |          |          | <i>Funalia trogii</i>                 | EF546236.1 | 646  | 95%  | 100.00% |
| 75 | 2 <sup>nd</sup> week | WJY (C)  | ON705420 | <i>Cladosporium</i> sp.               | MG554329.1 | 587  | 90%  | 99.04%  |
|    |                      |          |          | <i>Cladosporium parahalotolerans</i>  | MF473164.1 | 837  | 90%  | 99.04%  |
| 76 | 2 <sup>nd</sup> week | WJR (UN) | ON705421 | <i>Sporobolomyces carnicolor</i>      | KY962981.1 | 603  | 96%  | 99.30%  |
| 77 | 2 <sup>nd</sup> week | WJR (UN) | ON705422 | <i>Penicillium oxalicum</i>           | MH766384.1 | 564  | 98%  | 100.00% |
| 78 | 2 <sup>nd</sup> week | WJR (UN) | ON705423 | <i>Coprinellus radians</i>            | MK087751.1 | 729  | 96%  | 99.69%  |
| 79 | 2 <sup>nd</sup> week | WJR (UN) | ON705424 | Ascomycota sp.                        | JN120374.1 | 1094 | 89%  | 93.95%  |
| 80 | 2 <sup>nd</sup> week | WJR (UN) | ON705425 | <i>Rhodospodiobolus odoratus</i>      | MT340844.1 | 581  | 96%  | 99.65%  |
| 81 | 2 <sup>nd</sup> week | WJR (UN) | ON705426 | <i>Coprinellus radians</i>            | MK087751.1 | 729  | 96%  | 99.69%  |
| 82 | 2 <sup>nd</sup> week | WJR (UN) | ON705427 | <i>Sporobolomyces carnicolor</i>      | MK592826.1 | 571  | 96%  | 99.30%  |
| 83 | 2 <sup>nd</sup> week | WJR (UN) | ON705428 | <i>Coprinellus radians</i>            | MK087751.1 | 729  | 95%  | 99.39%  |
| 84 | 2 <sup>nd</sup> week | WJR (UN) | ON705429 | <i>Hirsutella</i> sp.                 | MZ380071.1 | 587  | 94%  | 99.81%  |
| 85 | 2 <sup>nd</sup> week | WJR (UN) | ON705430 | <i>Psathyrella bivelata</i>           | MF325962.1 | 728  | 94%  | 99.85%  |
| 86 | 2 <sup>nd</sup> week | WJR (UN) | ON705431 | <i>Colletotrichum gloeosporioides</i> | JQ356541.1 | 551  | 95%  | 99.62%  |
| 87 | 2 <sup>nd</sup> week | WJR (UN) | ON705432 | <i>Aureobasidium pullulans</i>        | MN922096.1 | 543  | 71%  | 98.77%  |
| 88 | 2 <sup>nd</sup> week | WJR (UN) | ON705433 | Hypocreales sp.                       | MN856379.1 | 545  | 97%  | 99.07%  |
|    |                      |          |          | <i>Clonostachys rosea</i>             | MW113490.1 | 588  | 95%  | 99.81%  |
| 89 | 2 <sup>nd</sup> week | WJR (UN) | ON705434 | <i>Keissleriella</i> sp.              | MW764302.1 | 543  | 96%  | 99.07%  |
| 90 | 2 <sup>nd</sup> week | WJY (UN) | ON705435 | <i>Coprinellus xanthothrix</i>        | JN198387.1 | 700  | 97%  | 99.24%  |
| 91 | 2 <sup>nd</sup> week | WJY (UN) | ON705436 | <i>Sporobolomyces carnicolor</i>      | KY962981.1 | 603  | 94%  | 98.76%  |
| 92 | 2 <sup>nd</sup> week | WJY (UN) | ON705437 | <i>Aureobasidium pullulans</i>        | DQ680843.1 | 555  | 97%  | 98.20%  |
| 93 | 2 <sup>nd</sup> week | WJY (UN) | ON705438 | <i>Sporidiobolus</i> sp.              | KJ908838.1 | 577  | 97%  | 99.29%  |
|    |                      |          |          | <i>Sporobolomyces carnicolor</i>      | MT529870.1 | 557  | 95%  | 99.63%  |
| 94 | 2 <sup>nd</sup> week | WJY(UN)  | ON705439 | <i>Aureobasidium pullulans</i>        | DQ680843.1 | 555  | 94%  | 98.20%  |
| 95 | 2 <sup>nd</sup> week | WJY(UN)  | ON705440 | <i>Schizophyllum commune</i>          | MH392740.1 | 648  | 94%  | 99.50%  |

|     |                      |           |          |                                       |             |      |      |        |
|-----|----------------------|-----------|----------|---------------------------------------|-------------|------|------|--------|
| 96  | 2 <sup>nd</sup> week | WJY (UN)  | ON705441 | <i>Sporidiobolus</i> sp.              | KJ908838.1  | 577  | 98%  | 99.47% |
|     |                      |           |          | <i>Sporobolomyces carnicolor</i>      | MT529870.1  | 557  | 96%  | 99.64% |
| 97  | 2 <sup>nd</sup> week | WJY (UN)  | ON705442 | <i>Phaeosphaeria</i> sp.              | MH884074.1  | 521  | 93%  | 99.42% |
|     |                      |           |          | <i>Phaeosphaeria fuckelii</i>         | MZ396933.1  | 563  | 95%  | 98.86% |
| 98  | 2 <sup>nd</sup> week | WJY (UN)  | ON705443 | <i>Bullera</i> sp.                    | HQ631046.1  | 514  | 95%  | 99.10% |
|     |                      |           |          | <i>Hannaella sinensis</i>             | NR_111075.1 | 474  | 95%  | 99.10% |
| 99  | 2 <sup>nd</sup> week | WJY (UN)  | ON705444 | <i>Papiliotrema fuscus</i>            | KY962979.1  | 572  | 95%  | 98.87% |
| 100 | 2 <sup>nd</sup> week | NMWA (UN) | ON705445 | <i>Coprinellus radians</i>            | KP900252.1  | 658  | 98%  | 99.54% |
| 101 | 2 <sup>nd</sup> week | NMWA (UN) | ON705446 | <i>Schizophyllum commune</i>          | MH483677.1  | 614  | 99%  | 99.33% |
| 102 | 2 <sup>nd</sup> week | WJR (UN)  | ON705447 | <i>Irpex lacteus</i>                  | MT085750.1  | 643  | 99%  | 99.68% |
| 103 | 2 <sup>nd</sup> week | NMWA (UN) | ON705448 | <i>Sporidiobolus pararoseus</i>       | MN340037.1  | 571  | 95%  | 99.28% |
| 104 | 2 <sup>nd</sup> week | NMWA (UN) | ON705449 | <i>Schizophyllum commune</i>          | MN523303.1  | 592  | 97%  | 97.30% |
| 105 | 2 <sup>nd</sup> week | NMWA (UN) | ON705450 | <i>Sporobolomyces carnicolor</i>      | MK592826.1  | 571  | 94%  | 99.64% |
| 106 | 2 <sup>nd</sup> week | NMWA (UN) | ON705451 | <i>Cochliobolus sativus</i>           | JQ754031.1  | 580  | 96%  | 99.82% |
| 107 | 2 <sup>nd</sup> week | NMWA (C)  | ON705452 | <i>Cyphellaceae</i> sp.               | MG269994.1  | 702  | 95%  | 99.85% |
| 108 | 2 <sup>nd</sup> week | NMWA (C)  | ON705453 | <i>Sporidiobolus pararoseus</i>       | MN340037.1  | 571  | 95%  | 99.11% |
| 109 | 2 <sup>nd</sup> week | NMWA (C)  | ON705454 | <i>Coprinopsis atramentaria</i>       | MG132086.1  | 681  | 96%  | 98.96% |
| 110 | 2 <sup>nd</sup> week | NMWA (C)  | ON705455 | <i>Fusarium graminearum</i>           | MF800908.1  | 517  | 79%  | 99.29% |
| 111 | 2 <sup>nd</sup> week | NMWA (C)  | ON705456 | <i>Irpex lacteus</i>                  | MT085750.1  | 643  | 96%  | 99.38% |
| 112 | 2 <sup>nd</sup> week | NMWA (C)  | ON705457 | <i>Irpex lacteus</i>                  | ON705457.1  | 1241 | 100% | 100.0% |
| 113 | 2 <sup>nd</sup> week | NMWA (C)  | ON705458 | <i>Sporobolomyces carnicolor</i>      | KY962981.1  | 603  | 98%  | 99.46% |
| 114 | 2 <sup>nd</sup> week | NMWA (C)  | ON705459 | <i>Papiliotrema fuscus</i>            | KY962979.1  | 572  | 95%  | 98.68% |
| 115 | 2 <sup>nd</sup> week | NMWA (C)  | ON705460 | <i>Colletotrichum gloeosporioides</i> | JQ356541.1  | 551  | 98%  | 98.91% |
| 116 | 2 <sup>nd</sup> week | NMWA (C)  | ON705461 | <i>Sporobolomyces carnicolor</i>      | MK592826.1  | 571  | 97%  | 99.47% |
| 117 | 2 <sup>nd</sup> week | NMWA (C)  | ON705462 | <i>Schizophyllum commune</i>          | MF326432.1  | 647  | 76%  | 98.95% |
| 118 | 2 <sup>nd</sup> week | NMWA (C)  | ON705463 | <i>Schizophyllum commune</i>          | MF061788.1  | 606  | 99%  | 99.66% |
| 119 | 2 <sup>nd</sup> week | NMWA (C)  | ON705464 | <i>Fusarium graminearum</i>           | MK762537.1  | 503  | 68%  | 98.44% |
| 120 | 2 <sup>nd</sup> week | NMWA (C)  | ON705465 | <i>Sporidiobolus pararoseus</i>       | MN340037.1  | 571  | 95%  | 99.28% |
| 121 | 2 <sup>nd</sup> week | NMWA (C)  | ON705466 | <i>Fusarium graminearum</i>           | MZ648312.1  | 517  | 96%  | 99.61% |
| 122 | 2 <sup>nd</sup> week | NMWA (C)  | ON705467 | <i>Schizophyllum commune</i>          | MF061788.1  | 606  | 98%  | 99.01% |
| 123 | 2 <sup>nd</sup> week | NG (UN)   | ON705468 | <i>Pyricularia urashimae</i>          | MT586118.1  | 510  | 94%  | 99.80% |
| 124 | 2 <sup>nd</sup> week | NG (UN)   | ON705469 | <i>Clonostachys rosea</i>             | MW113490.1  | 588  | 95%  | 99.62% |
| 125 | 2 <sup>nd</sup> week | NG (UN)   | ON705470 | <i>Cladosporium</i> sp.               | MZ452398.1  | 546  | 97%  | 99.61% |
|     |                      |           |          | <i>Cladosporium cladosporioides</i>   | MT878604.1  | 538  | 97%  | 99.42% |
| 126 | 2 <sup>nd</sup> week | NG (UN)   | ON705471 | <i>Cyphellaceae</i> sp.               | MG269994.1  | 702  | 93%  | 99.54% |
| 127 | 2 <sup>nd</sup> week | NG (UN)   | ON705472 | <i>Sporobolomyces carnicolor</i>      | KY962981.1  | 603  | 94%  | 99.64% |
| 128 | 2 <sup>nd</sup> week | NG (UN)   | ON705473 | <i>Schizophyllum commune</i>          | MF061788.1  | 606  | 98%  | 99.01% |
| 129 | 2 <sup>nd</sup> week | NG (UN)   | ON705474 | Pleosporales sp.                      | HQ631015.1  | 588  | 79%  | 98.58% |

|     |                      |          |          |                                     |            |      |     |         |
|-----|----------------------|----------|----------|-------------------------------------|------------|------|-----|---------|
| 130 | 2 <sup>nd</sup> week | NG (UN)  | ON705475 | <i>Neosetophoma</i> sp.             | KU751879.1 | 569  | 96% | 99.82%  |
| 131 | 3 <sup>rd</sup> week | NG (C)   | ON705476 | <i>Cladosporium tenuissimum</i>     | JN624886.1 | 518  | 98% | 99.81%  |
| 132 | 3 <sup>rd</sup> week | NG (C)   | ON705477 | <i>Moesziomyces aphidis</i>         | MN038047.1 | 812  | 98% | 99.60%  |
| 133 | 3 <sup>rd</sup> week | NG (C)   | ON705478 | <i>Trichothecium roseum</i>         | MH470248.1 | 603  | 97% | 99.14%  |
| 134 | 3 <sup>rd</sup> week | NG (C)   | ON705479 | <i>Magnaporthe</i> sp.              | MK595550.1 | 731  | 97% | 98.84%  |
|     |                      |          |          | <i>Pyricularia grisea</i>           | OK093407.1 | 577  | 95% | 99.41%  |
| 135 | 3 <sup>rd</sup> week | NG (C)   | ON705480 | <i>Cladosporium halotolerans</i>    | MT588810.1 | 575  | 98% | 95.80%  |
| 136 | 3 <sup>rd</sup> week | NG (C)   | ON705480 | <i>Cercospora brassicola</i>        | MN209930.1 | 547  | 97% | 99.41%  |
| 137 | 3 <sup>rd</sup> week | NG (C)   | ON705482 | <i>Cladosporium cladosporioides</i> | MW113635.1 | 669  | 98% | 99.07%  |
| 138 | 3 <sup>rd</sup> week | NG (C)   | ON705483 | <i>Alternaria brassicae</i>         | MW008888.1 | 545  | 98% | 99.63%  |
| 139 | 3 <sup>rd</sup> week | NG (C)   | ON705484 | <i>Cladosporium tenuissimum</i>     | KP689183.1 | 522  | 98% | 99.61%  |
| 140 | 3 <sup>rd</sup> week | NG (C)   | ON705485 | <i>Alternaria</i> sp.               | MT487763.1 | 545  | 96% | 99.81%  |
|     |                      |          |          | <i>Alternaria tenuissima</i>        | KR709056.1 | 545  | 96% | 100.00% |
| 141 | 3 <sup>rd</sup> week | NG (C)   | ON705486 | <i>Penicillium oxalicum</i>         | MT597864.1 | 601  | 77% | 99.31%  |
| 142 | 3 <sup>rd</sup> week | NG (C)   | ON705487 | <i>Cercospora canescens</i>         | MN400244.1 | 547  | 99% | 99.02%  |
| 143 | 3 <sup>rd</sup> week | NG (UN)  | ON705488 | <i>Curvularia plantarum</i>         | MW581905.1 | 606  | 98% | 99.47%  |
| 144 | 3 <sup>rd</sup> week | NG (UN)  | ON705489 | <i>Rhodotorula mucilaginosa</i>     | MN427959.1 | 1140 | 98% | 98.82%  |
| 145 | 3 <sup>rd</sup> week | NG (UN)  | ON705490 | <i>Rhodotorula</i> sp.              | MW008901.1 | 543  | 97% | 99.81%  |
|     |                      |          |          | <i>Alternaria compacta</i>          | MW008904.1 | 542  | 97% | 99.63%  |
| 146 | 3 <sup>rd</sup> week | NG (UN)  | ON705491 | <i>Penicillium oxalicum</i>         | KY400080.1 | 574  | 98% | 99.29%  |
| 147 | 3 <sup>rd</sup> week | NG (UN)  | ON705492 | <i>Cladosporium oxysporum</i>       | MT079170.1 | 526  | 99% | 99.42%  |
| 148 | 3 <sup>rd</sup> week | NG (UN)  | ON705493 | <i>Magnaporthe oryzae</i>           | FN555113.1 | 560  | 97% | 98.65%  |
| 149 | 3 <sup>rd</sup> week | NG (UN)  | ON705494 | <i>Cladosporium tenuissimum</i>     | KP689183.1 | 522  | 96% | 99.61%  |
| 150 | 3 <sup>rd</sup> week | NG (UN)  | ON705495 | <i>Pseudopithomyces palmicola</i>   | MN788110.1 | 848  | 97% | 98.98%  |
| 151 | 3 <sup>rd</sup> week | NG (UN)  | ON705496 | <i>Cladosporium cladosporioides</i> | MW453186.1 | 525  | 97% | 99.42%  |
| 152 | 3 <sup>rd</sup> week | NG (UN)  | ON705497 | <i>Aspergillus niger</i>            | MW958037.1 | 586  | 96% | 99.82%  |
| 153 | 3 <sup>rd</sup> week | WJR (C)  | ON705498 | <i>Alternaria alternata</i>         | MF099863.1 | 982  | 99% | 99.27%  |
| 154 | 3 <sup>rd</sup> week | WJR (C)  | ON705499 | <i>Cladosporium cladosporioides</i> | MW113635.1 | 669  | 98% | 98.52%  |
| 155 | 3 <sup>rd</sup> week | WJR (C)  | ON705500 | <i>Alternaria alternata</i>         | MW008971.1 | 542  | 98% | 99.63%  |
| 156 | 3 <sup>rd</sup> week | WJR (C)  | ON705501 | <i>Alternaria compacta</i>          | MW008978.1 | 537  | 97% | 100.00% |
| 157 | 3 <sup>rd</sup> week | WJR (C)  | ON705502 | <i>Nigrospora</i> sp.               | MN341508.1 | 555  | 84% | 99.34%  |
|     |                      |          |          | <i>Nigrospora oryzae</i>            | MF356577.1 | 532  | 96% | 99.34%  |
| 158 | 3 <sup>rd</sup> week | WJR (C)  | ON705503 | <i>Cladosporium oxysporum</i>       | MT079170.1 | 526  | 96% | 99.41%  |
| 159 | 3 <sup>rd</sup> week | WJR (C)  | ON705504 | <i>Alternaria alternata</i>         | MT093259.1 | 546  | 97% | 99.44%  |
| 160 | 3 <sup>rd</sup> week | WJR (C)  | ON705505 | <i>Penicillium oxalicum</i>         | MN856268.1 | 594  | 87% | 100.00% |
| 161 | 3 <sup>rd</sup> week | WJR (C)  | ON705506 | <i>Moesziomyces aphidis</i>         | MH777069.1 | 793  | 33% | 93.44%  |
| 162 | 3 <sup>rd</sup> week | WJR (UN) | ON705507 | <i>Cladosporium tenuissimum</i>     | MT072081.1 | 525  | 98% | 99.42%  |

|     |                      |          |          |                                     |            |      |      |         |
|-----|----------------------|----------|----------|-------------------------------------|------------|------|------|---------|
| 163 | 3 <sup>rd</sup> week | WJR (UN) | ON705508 | Ascomycota sp.                      | MH430722.1 | 551  | 98%  | 99.63%  |
| 164 | 3 <sup>rd</sup> week | WJR (UN) | ON705509 | <i>Aspergillus aculeatus</i>        | MK450627.1 | 851  | 82%% | 99.12%  |
| 165 | 3 <sup>rd</sup> week | WJR (UN) | ON705510 | <i>Alternaria</i> sp.               | MK649975.1 | 544  | 98%  | 99.81%  |
|     |                      |          |          | <i>Alternaria brassicae</i>         | MW008950.1 | 553  | 98%  | 100.00% |
| 166 | 3 <sup>rd</sup> week | WJR (UN) | ON705511 | <i>Epicoccum nigrum</i>             | MH645206.1 | 586  | 97%  | 99.23%  |
| 167 | 3 <sup>rd</sup> week | WJY (C)  | ON705512 | <i>Alternaria alternata</i>         | KF293886.1 | 545  | 100% | 99.26%  |
| 168 | 3 <sup>rd</sup> week | WJY (C)  | ON705513 | <i>Penicillium oxalicum</i>         | MT597864.1 | 601  | 90%  | 100.00% |
| 169 | 3 <sup>rd</sup> week | WJY (C)  | ON705514 | <i>Alternaria alternata</i>         | MW008892.1 | 542  | 97%  | 99.63%  |
| 170 | 3 <sup>rd</sup> week | WJY (C)  | ON705515 | <i>Septoriella oudemansii</i>       | KR873250.1 | 1142 | 93%  | 100.00% |
| 171 | 3 <sup>rd</sup> week | WJY (C)  | ON705516 | <i>Trichoderma harzianum</i>        | KJ767088.1 | 622  | 99%  | 92.39%  |
| 172 | 3 <sup>rd</sup> week | WJY (C)  | ON705517 | <i>Trichoderma harzianum</i>        | MW454982.1 | 584  | 96%  | 99.66%  |
| 173 | 3 <sup>rd</sup> week | WJY (UN) | ON705518 | <i>Amphobotrys ricini</i>           | MT223777.1 | 489  | 83%  | 99.74%  |
| 174 | 3 <sup>rd</sup> week | WJY (UN) | ON705519 | <i>Pyricularia urashimae</i>        | MT586118.1 | 510  | 95%  | 99.21%  |
| 175 | 3 <sup>rd</sup> week | WJY (UN) | ON705520 | <i>Pleosporales</i> sp.             | KX379244.1 | 525  | 95%  | 99.81%  |
|     |                      |          |          | <i>Cladosporium cladosporioides</i> | KX258800.1 | 526  | 96%  | 99.43%  |
| 176 | 3 <sup>rd</sup> week | WJY (UN) | ON705521 | <i>Cladosporium cladosporioides</i> | KF876823.1 | 522  | 97%  | 99.42%  |
| 177 | 3 <sup>rd</sup> week | WJY (UN) | ON705522 | <i>Alternaria angustiovoidea</i>    | MW009022.1 | 551  | 97%  | 100.00% |
| 178 | 3 <sup>rd</sup> week | WJY (UN) | ON705523 | <i>Alternaria compacta</i>          | MW008933.1 | 540  | 97%  | 99.44%  |
| 179 | 3 <sup>rd</sup> week | WJY (UN) | ON705524 | <i>Cladosporium cladosporioides</i> | KF876823.1 | 522  | 97%  | 99.42%  |
| 180 | 3 <sup>rd</sup> week | WJY (UN) | ON705525 | <i>Cladosporium oryzae</i>          | KY400092.1 | 532  | 97%  | 99.43%  |
| 181 | 3 <sup>rd</sup> week | WJY (UN) | ON705526 | <i>Alternaria solani</i>            | MW009039.1 | 551  | 98%  | 99.64%  |
| 182 | 3 <sup>rd</sup> week | WJY (UN) | ON705527 | <i>Alternaria</i> sp.               | MK649973.1 | 543  | 98%  | 99.63%  |
|     |                      |          |          | <i>Alternaria tamaricis</i>         | MW009013.1 | 542  | 97%  | 99.81%  |
| 183 | 3 <sup>rd</sup> week | WJY (UN) | ON705528 | <i>Alternaria solani</i>            | MW009039.1 | 551  | 97%  | 99.82%  |
| 184 | 3 <sup>rd</sup> week | WJY (UN) | ON705529 | <i>Alternaria alternata</i>         | MW008996.1 | 548  | 98%  | 99.45%  |
| 185 | 3 <sup>rd</sup> week | NMWA (C) | ON705530 | <i>Alternaria</i> sp.               | KX064983.1 | 544  | 97%  | 99.63%  |
|     |                      |          |          | <i>Alternaria tenuissima</i>        | KM513592.1 | 547  | 97%  | 99.45%  |
| 186 | 3 <sup>rd</sup> week | NMWA (C) | ON705531 | <i>Alternaria brassicae</i>         | MW009012.1 | 552  | 97%  | 99.81%  |
| 187 | 3 <sup>rd</sup> week | NMWA (C) | ON705532 | <i>Cladosporium cladosporioides</i> | KC880082.1 | 525  | 97%  | 99.81%  |
| 188 | 3 <sup>rd</sup> week | NMWA (C) | ON705533 | <i>Alternaria alternata</i>         | MN173818.1 | 542  | 97%  | 99.63%  |
| 189 | 3 <sup>rd</sup> week | NMWA (C) | ON705534 | <i>Alternaria alternata</i>         | MK281551.1 | 546  | 97%  | 99.45%  |
| 190 | 3 <sup>rd</sup> week | NMWA (C) | ON705535 | <i>Alternaria solani</i>            | MW009039.1 | 551  | 97%  | 100.00% |
| 191 | 3 <sup>rd</sup> week | NMWA (C) | ON705536 | <i>Deniquelata</i> sp.              | MH316153.1 | 686  | 93%  | 98.25%  |
|     |                      |          |          | <i>Deniquelata quercina</i>         | MT820404.1 | 675  | 90%  | 98.79%  |
| 192 | 3 <sup>rd</sup> week | NMWA (C) | ON705537 | <i>Alternaria</i> sp.               | MK649974.1 | 545  | 97%  | 100.00% |
| 193 | 3 <sup>rd</sup> week | NMWA (C) | ON705538 | <i>Alternaria angustiovoidea</i>    | MW009022.1 | 551  | 96%  | 99.81%  |
| 194 | 3 <sup>rd</sup> week | NMWA (C) | ON705539 | <i>Cladosporium cucumerinum</i>     | KR912311.1 | 516  | 94%  | 100.00% |
| 195 | 3 <sup>rd</sup> week | NMWA (C) | ON705540 | <i>Moesziomyces bullatus</i>        | MK024203.1 | 755  | 96%  | 90.96%  |

|     |                      |           |          |                                     |            |      |         |         |
|-----|----------------------|-----------|----------|-------------------------------------|------------|------|---------|---------|
| 196 | 3 <sup>rd</sup> week | NMWA (C)  | ON705541 | <i>Cladosporium tenuissimum</i>     | JN624886.1 | 518  | 96%     | 99.61%  |
| 197 | 3 <sup>rd</sup> week | NMWA (UN) | ON705542 | <i>Fusarium incarnatum</i>          | MT565585.1 | 505  | 70%     | 98.63%  |
| 198 | 3 <sup>rd</sup> week | NMWA (UN) | ON705543 | <i>Pyricularia urashimae</i>        | MT586118.1 | 510  | 79%     | 98.58%  |
| 199 | 3 <sup>rd</sup> week | NMWA (UN) | ON705544 | <i>Pyricularia urashimae</i>        | ON705544.1 | 567  | 100.00% | 99.46%  |
| 200 | 3 <sup>rd</sup> week | NMWA (UN) | ON705545 | <i>Aspergillus flavus</i>           | MF685316.1 | 555  | 96%     | 98.19%  |
| 201 | 3 <sup>rd</sup> week | NMWA (UN) | ON705546 | <i>Ascomycota</i> sp.               | MH430722.1 | 551  | 90%     | 99.19%  |
|     |                      |           |          | <i>Aspergillus aculeatus</i>        | MH389050.1 | 552  | 90%     | 99.19%  |
| 202 | 3 <sup>rd</sup> week | BJD (C)   | ON705547 | <i>Alternaria</i> sp.               | MK649963.1 | 548  | 96%     | 99.81%  |
|     |                      |           |          | <i>Alternaria compacta</i>          | MW009019.1 | 553  | 96%     | 99.81%  |
| 203 | 3 <sup>rd</sup> week | BJD (C)   | ON705548 | <i>Torula</i> sp.                   | KC427082.1 | 567  | 95%     | 99.62%  |
| 204 | 3 <sup>rd</sup> week | BJD (C)   | ON705549 | <i>Alternaria solani</i>            | MW009039.1 | 551  | 99%     | 99.63%  |
| 205 | 3 <sup>rd</sup> week | BJD (C)   | ON705550 | <i>Alternaria</i> sp.               | ON705550.1 | 558  | 100%    | 100.00% |
|     |                      |           |          | <i>Alternaria compacta</i>          | ON790467.1 | 678  | 97%     | 99.82%  |
| 206 | 3 <sup>rd</sup> week | BJD (C)   | ON705551 | <i>Alternaria</i> sp.               | ON705551.1 | 555  | 100%    | 100.00% |
|     |                      |           |          | <i>Alternaria compacta</i>          | OP364483.1 | 554  | 96%     | 100.00% |
| 207 | 3 <sup>rd</sup> week | BJD (C)   | ON705552 | <i>Cladosporium</i> sp.             | ON705552.1 | 535  | 100%    | 100.00% |
|     |                      |           |          | <i>Cladosporium tenuissimum</i>     | OM237117.1 | 533  | 96%     | 99.81%  |
| 208 | 3 <sup>rd</sup> week | BJD (C)   | ON705553 | <i>Phoma multirostrata</i>          | KR709058.1 | 530  | 96%     | 99.62%  |
| 209 | 3 <sup>rd</sup> week | BJD (C)   | ON705554 | <i>Penicillium oxalicum</i>         | MH367526.1 | 564  | 100%    | 99.29%  |
| 210 | 3 <sup>rd</sup> week | BJD (C)   | ON705555 | <i>Alternaria angustiovoidea</i>    | MW009022.1 | 551  | 97%     | 99.45%  |
| 211 | 3 <sup>rd</sup> week | BJD (C)   | ON705556 | <i>Cladosporium cladosporioides</i> | MT367262.1 | 556  | 87%     | 99.33%  |
| 212 | 3 <sup>rd</sup> week | BJD (C)   | ON705557 | <i>Alternaria solani</i>            | MN871616.1 | 541  | 88%     | 99.38%  |
| 213 | 3 <sup>rd</sup> week | BJD (UN)  | ON705558 | <i>Alternaria alternata</i>         | KX783402.1 | 545  | 99%     | 99.81%  |
| 214 | 3 <sup>rd</sup> week | BJD (UN)  | ON705559 | <i>Cladosporium oxysporum</i>       | MK226241.1 | 522  | 82%     | 98.84%  |
| 215 | 3 <sup>rd</sup> week | BJD (UN)  | ON705560 | <i>Cladosporium sphaerospermum</i>  | MT582795.1 | 1369 | 72%     | 98.96%  |
| 216 | 3 <sup>rd</sup> week | BJD (UN)  | ON705561 | <i>Pseudozyma</i> sp.               | MN515019.1 | 780  | 97%     | 100.00% |
|     |                      |           |          | <i>Moesziomyces antarcticus</i>     | MK027038.1 | 747  | 97%     | 100.00% |
| 217 | 3 <sup>rd</sup> week | BJD (UN)  | ON705562 | <i>Penicillium oxalicum</i>         | MH766384.1 | 564  | 98%     | 100.00% |
| 218 | 3 <sup>rd</sup> week | BJD (UN)  | ON705563 | <i>Alternaria alternata</i>         | MW009036.1 | 552  | 98%     | 99.81%  |
| 219 | 3 <sup>rd</sup> week | BJD (UN)  | ON705564 | <i>Alternaria alternata</i>         | MW008882.1 | 543  | 98%     | 99.07%  |
| 220 | 3 <sup>rd</sup> week | BJD (UN)  | ON705565 | <i>Alternaria tenuissima</i>        | MK534905.1 | 528  | 72%     | 99.24%  |
| 221 | 3 <sup>rd</sup> week | BJD (UN)  | ON705566 | <i>Cercospora chrysanthemi</i>      | KR709060.1 | 515  | 99%     | 99.80%  |
| 222 | 3 <sup>rd</sup> week | BJD (UN)  | ON705567 | <i>Alternaria</i> sp.               | MK649972.1 | 547  | 99%     | 99.44%  |
|     |                      |           |          | <i>Alternaria tenuissima</i>        | KX783378.1 | 543  | 100%    | 99.44%  |
| 223 | 3 <sup>rd</sup> week | BJD (UN)  | ON705568 | <i>Cercospora capsici</i>           | HQ700354.1 | 513  | 98%     | 99.60%  |
| 224 | 3 <sup>rd</sup> week | BJD (UN)  | ON705569 | <i>Alternaria alternata</i>         | MT635274.1 | 566  | 96%     | 100.00% |
| 225 | 3 <sup>rd</sup> week | BJD (UN)  | ON705570 | <i>Bipolaris setariae</i>           | MN215638.1 | 722  | 97%     | 99.45%  |



|     |                      |          |          |                                 |            |      |     |         |
|-----|----------------------|----------|----------|---------------------------------|------------|------|-----|---------|
| 226 | 3 <sup>rd</sup> week | BJD (UN) | ON705571 | <i>Cladosporium delicatulum</i> | MN644691.1 | 1071 | 90% | 99.58%  |
| 227 | 3 <sup>rd</sup> week | BJD (UN) | ON705572 | <i>Alternaria porri</i>         | MW009048.1 | 552  | 98% | 100.00% |
| 228 | 3 <sup>rd</sup> week | BJD (UN) | ON705573 | <i>Alternaria tenuissima</i>    | MH824253.1 | 570  | 94% | 99.42   |

**Supplementary Table S3:** Distribution of the most abundant fungal genera. Genera with very low relative abundances (<1%) were merged as “others”.

|                       | BJD |    | NG |   | WJY |   | WJR |   | NMWA |   | Total | %     |
|-----------------------|-----|----|----|---|-----|---|-----|---|------|---|-------|-------|
|                       | C   | U  | C  | U | C   | U | C   | U | C    | U |       |       |
| <i>Alternaria</i>     | 8   | 12 | 3  | 1 | 2   | 6 | 4   | 2 | 6    | 3 | 47    | 20.61 |
| <i>Ascomycota</i>     | 0   | 0  | 0  | 0 | 0   | 0 | 0   | 2 | 0    | 1 | 3     | 1.32  |
| <i>Aspergillus</i>    | 0   | 1  | 4  | 1 | 0   | 0 | 0   | 1 | 0    | 2 | 9     | 3.95  |
| <i>Aureobasidium</i>  | 0   | 0  | 0  | 0 | 0   | 2 | 0   | 1 | 0    | 1 | 4     | 1.75  |
| <i>Cercospora</i>     | 0   | 2  | 2  | 0 | 0   | 0 | 0   | 0 | 0    | 0 | 4     | 1.75  |
| <i>Cladosporium</i>   | 1   | 6  | 5  | 3 | 1   | 5 | 2   | 1 | 3    | 0 | 27    | 11.84 |
| <i>Coprinellus</i>    | 1   | 0  | 1  | 0 | 0   | 4 | 1   | 0 | 0    | 1 | 8     | 3.51  |
| <i>Fusarium</i>       | 0   | 0  | 0  | 0 | 0   | 0 | 0   | 0 | 3    | 1 | 4     | 1.75  |
| <i>Hannaella</i>      | 1   | 0  | 1  | 0 | 2   | 0 | 0   | 0 | 0    | 0 | 4     | 1.75  |
| <i>Irpex</i>          | 0   | 0  | 1  | 0 | 0   | 0 | 0   | 1 | 1    | 0 | 3     | 1.32  |
| <i>Keissleriella</i>  | 0   | 0  | 0  | 0 | 0   | 0 | 2   | 1 | 0    | 0 | 3     | 1.32  |
| <i>Moesziomyces</i>   | 0   | 0  | 1  | 0 | 1   | 0 | 1   | 0 | 1    | 0 | 4     | 1.75  |
| <i>Penicillium</i>    | 1   | 1  | 1  | 1 | 1   | 1 | 1   | 1 | 0    | 1 | 9     | 3.95  |
| <i>Pyricularia</i>    | 0   | 0  | 0  | 1 | 0   | 1 | 0   | 0 | 0    | 1 | 3     | 1.32  |
| <i>Schizophyllum</i>  | 0   | 2  | 2  | 2 | 1   | 1 | 2   | 0 | 2    | 2 | 14    | 6.14  |
| <i>Sporidiobolus</i>  | 1   | 3  | 0  | 1 | 1   | 2 | 0   | 0 | 2    | 1 | 11    | 4.82  |
| <i>Sporobolomyces</i> | 1   | 0  | 1  | 2 | 2   | 1 | 1   | 2 | 2    | 1 | 13    | 5.70  |
| <i>Trichoderma</i>    | 3   | 0  | 0  | 0 | 2   | 0 | 0   | 0 | 0    | 0 | 5     | 2.19  |
| Others (<1%)          | 3   | 3  | 4  | 6 | 6   | 6 | 4   | 6 | 6    | 2 | 46    | 20.18 |

**Supplementary Table S4:** Airborne fungal concentration at each sampling location.

| Sampling sites |   | First week<br>(CFU/m <sup>3</sup> ) | Second week<br>(CFU/m <sup>3</sup> ) | Third week<br>(CFU/m <sup>3</sup> ) |
|----------------|---|-------------------------------------|--------------------------------------|-------------------------------------|
| BJD            | C | 80                                  | 40                                   | 90                                  |
|                | U | 40                                  | 90                                   | 180                                 |
| NG             | C | 70                                  | 80                                   | 120                                 |
|                | U | 30                                  | 60                                   | 100                                 |
| WJY            | C | 10                                  | 120                                  | 60                                  |
|                | U | 60                                  | 130                                  | 120                                 |
| WJR            | C | 50                                  | 40                                   | 90                                  |
|                | U | 10                                  | 120                                  | 50                                  |
| NMWA           | C | 10                                  | 150                                  | 110                                 |
|                | U | 50                                  | 60                                   | 60                                  |

**Supplementary Table S5.** Fungal genera distribution at U and C sites.

| <b>Fungal genera</b>    | <b>Total Strains count At C sites</b> | <b>Total Strains count At U sites</b> |
|-------------------------|---------------------------------------|---------------------------------------|
| <i>Alternaria</i>       | 23                                    | 24                                    |
| <i>Amphobotrys</i>      | 0                                     | 1                                     |
| <i>Arthrinium</i>       | 0                                     | 1                                     |
| <i>Aspergillus</i>      | 4                                     | 5                                     |
| <i>Aureobasidium</i>    | 0                                     | 4                                     |
| <i>Bipolaris</i>        | 1                                     | 1                                     |
| <i>Botryosporium</i>    | 1                                     | 0                                     |
| <i>Bullera</i>          | 0                                     | 1                                     |
| <i>Cercospora</i>       | 2                                     | 2                                     |
| <i>Chaetomium</i>       | 1                                     | 0                                     |
| <i>Choanephora</i>      | 1                                     | 0                                     |
| <i>Cladosporium</i>     | 13                                    | 14                                    |
| <i>Clonostachys</i>     | 0                                     | 1                                     |
| <i>Cochliobolus</i>     | 0                                     | 1                                     |
| <i>Colletotrichum</i>   | 1                                     | 1                                     |
| <i>Coprinellus</i>      | 3                                     | 5                                     |
| <i>Coprinopsis</i>      | 1                                     | 0                                     |
| <i>Curvularia</i>       | 0                                     | 1                                     |
| <i>Deniquelata</i>      | 1                                     | 0                                     |
| <i>Didymella</i>        | 1                                     | 1                                     |
| <i>Epicoccum</i>        | 0                                     | 1                                     |
| <i>Fusarium</i>         | 3                                     | 1                                     |
| <i>Hirsutella</i>       | 0                                     | 1                                     |
| <i>Hannaella</i>        | 4                                     | 1                                     |
| <i>Irpex</i>            | 2                                     | 1                                     |
| <i>Keissleriella</i>    | 2                                     | 1                                     |
| <i>Lophiostoma</i>      | 1                                     | 0                                     |
| <i>Magnaporthe</i>      | 1                                     | 1                                     |
| <i>Moesziomyces</i>     | 4                                     | 0                                     |
| <i>Neosetophoma</i>     | 1                                     | 1                                     |
| <i>Nigrospora</i>       | 1                                     | 0                                     |
| <i>Papillotrema</i>     | 1                                     | 1                                     |
| <i>Penicillium</i>      | 4                                     | 5                                     |
| <i>Phaeosphaeria</i>    | 0                                     | 1                                     |
| <i>Phoma</i>            | 2                                     | 0                                     |
| <i>Psathyrella</i>      | 0                                     | 1                                     |
| <i>Pseudopithomyces</i> | 0                                     | 1                                     |
| <i>Pseudozyma</i>       | 0                                     | 1                                     |
| <i>Pyricularia</i>      | 0                                     | 3                                     |

|                           |            |            |
|---------------------------|------------|------------|
| <i>Rhizopus</i>           | 0          | 1          |
| <i>Rhodosporiobolus</i>   | 0          | 1          |
| <i>Rhodotorula</i>        | 0          | 1          |
| <i>Schizophyllum</i>      | 7          | 7          |
| <i>Scopulariopsis</i>     | 0          | 1          |
| <i>Septoriella</i>        | 1          | 0          |
| <i>Setomelanomma</i>      | 1          | 0          |
| <i>Sporidiobolus</i>      | 4          | 7          |
| <i>Sporobolomyces</i>     | 7          | 6          |
| <i>Torula</i>             | 1          | 0          |
| <i>Trichoderma</i>        | 5          | 0          |
| <i>Trichothecium</i>      | 1          | 0          |
| <i>Typhula</i>            | 1          | 0          |
| <b>58 genera in total</b> | <b>112</b> | <b>116</b> |

**Supplementary Table S6:** Environmental factors recorded in each sampling site at the time of sampling (C = center of the bridge; U = under the bridge).

| Location             | 1st week         |        | 2nd week         |        | 3rd week         |        |
|----------------------|------------------|--------|------------------|--------|------------------|--------|
|                      | Temperature (°C) | RH (%) | Temperature (°C) | RH (%) | Temperature (°C) | RH (%) |
| Northgate (C)        | 25.3             | 79.9   | 22.9             | 93.1   | 29.6             | 77.2   |
| Northgate (U)        | 24.2             | 79.0   | 23.0             | 93.2   | 29.6             | 77.2   |
| Nanmenwai avenue (C) | 23.2             | 63.4   | 27.9             | 93.2   | 28.6             | 77.2   |
| Nanmenwai avenue (U) | 23.6             | 63.2   | 27.5             | 93.2   | 28.6             | 77.2   |
| Wujiayao avenue (C)  | 29.9             | 81.6   | 26.9             | 93.2   | 22.4             | 75.2   |
| Wujiayao avenue (U)  | 30.0             | 81.6   | 25.9             | 93.2   | 21.8             | 74.3   |
| Binjiangdao (C)      | 25.9             | 70.6   | 28.7             | 93.3   | 25.5             | 77.2   |
| Binjiangdao (U)      | 26.1             | 70.6   | 28.0             | 93.3   | 24.2             | 77.2   |
| Weijin road (C)      | 27.2             | 79.9   | 25.7             | 93.2   | 23.2             | 63.9   |
| Weijin road (U)      | 27.0             | 79.9   | 23.3             | 93.2   | 23.1             | 74.1   |

a

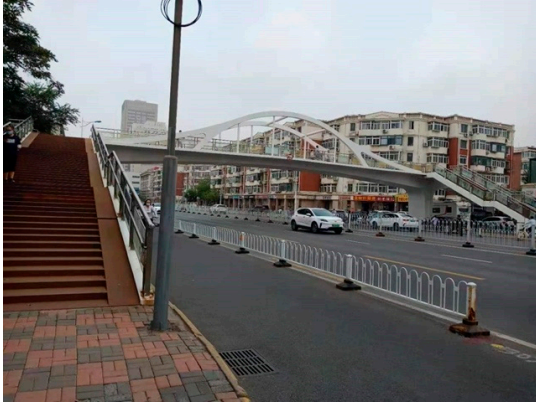

b

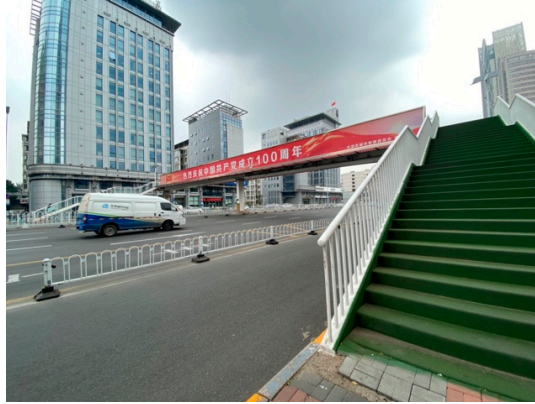

c

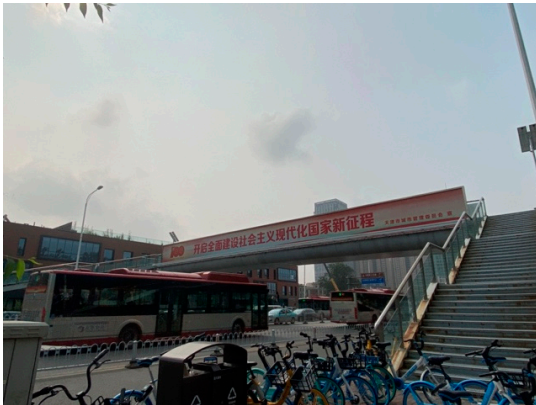

d

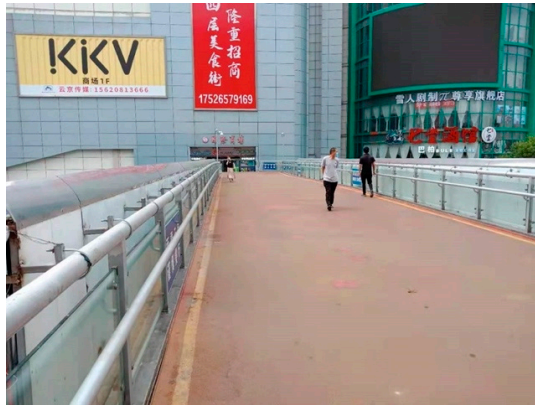

**Supplementary Figure S1:** Sampling sites. NG (a), NMWA (b), and WJR pedestrian bridges; top central area of BJD pedestrian bridge (d).

a

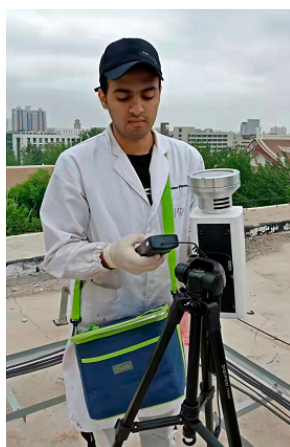

b

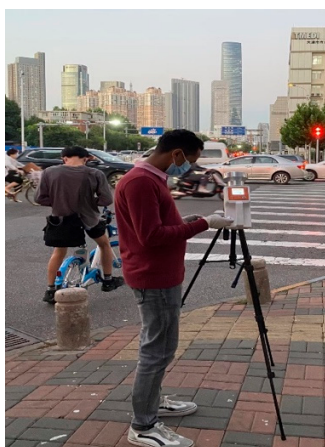

c

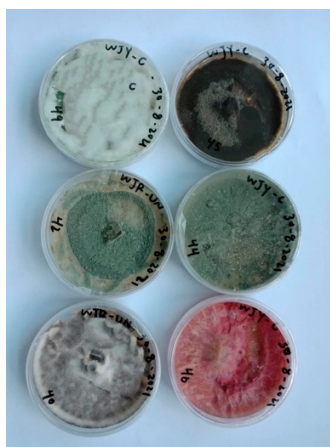

d

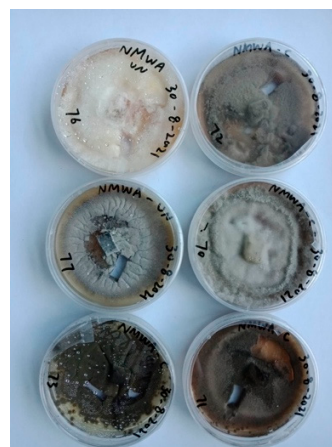

**Supplementary Figure S2:** Collection of air samples (a, b) and examples of airborne fungal strains isolated from the analyzed pedestrian bridges (c, d).



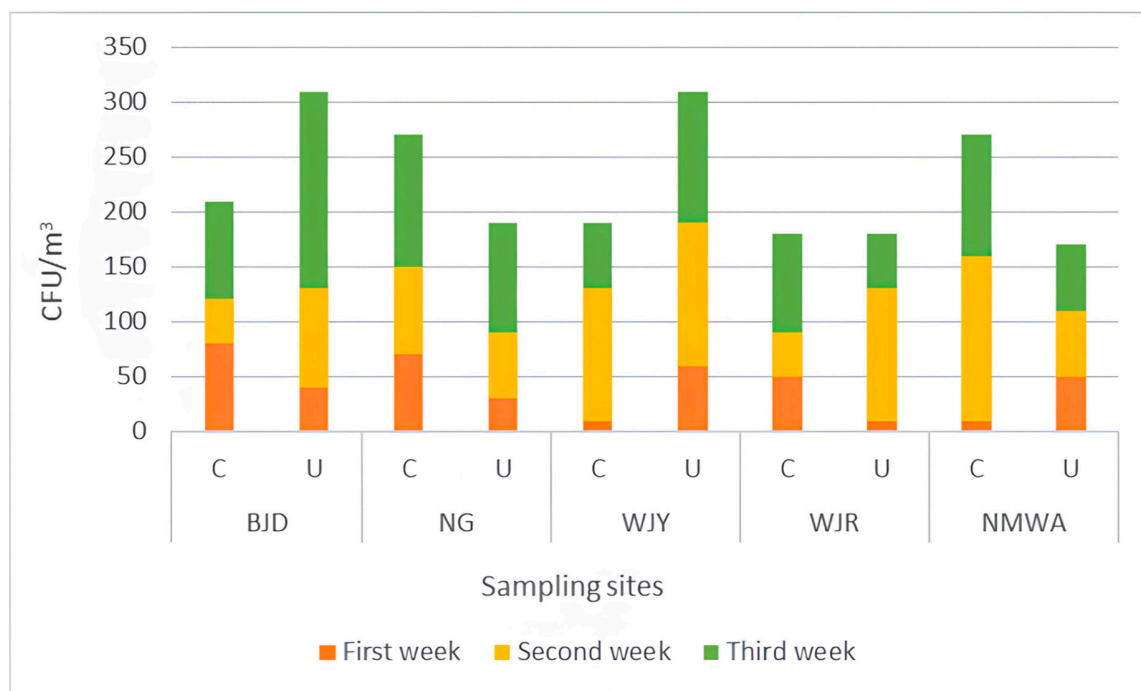

**Supplementary Figure S3:** Fungal concentration at each experimental location (C = the top central area of the bridges; U = under the bridges along the side walk).

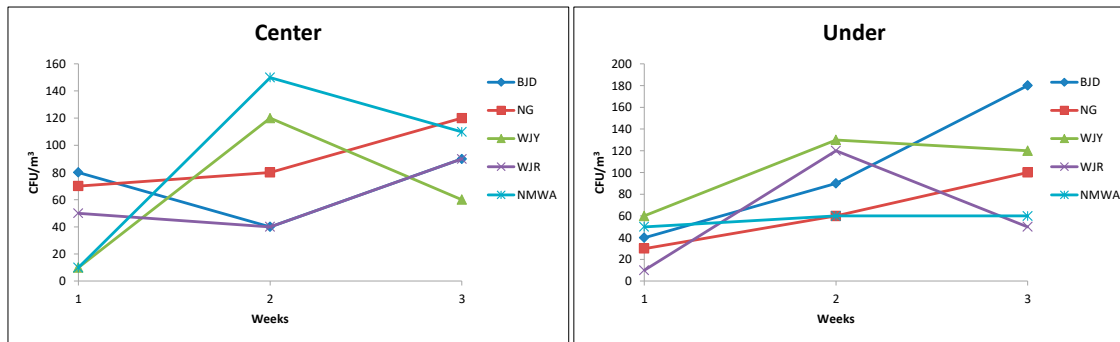

**Supplementary Figure S4:** Concentration of airborne fungi at the center and under the 5 bridges during the 3 weeks sampling period (CFU/m<sup>3</sup>).

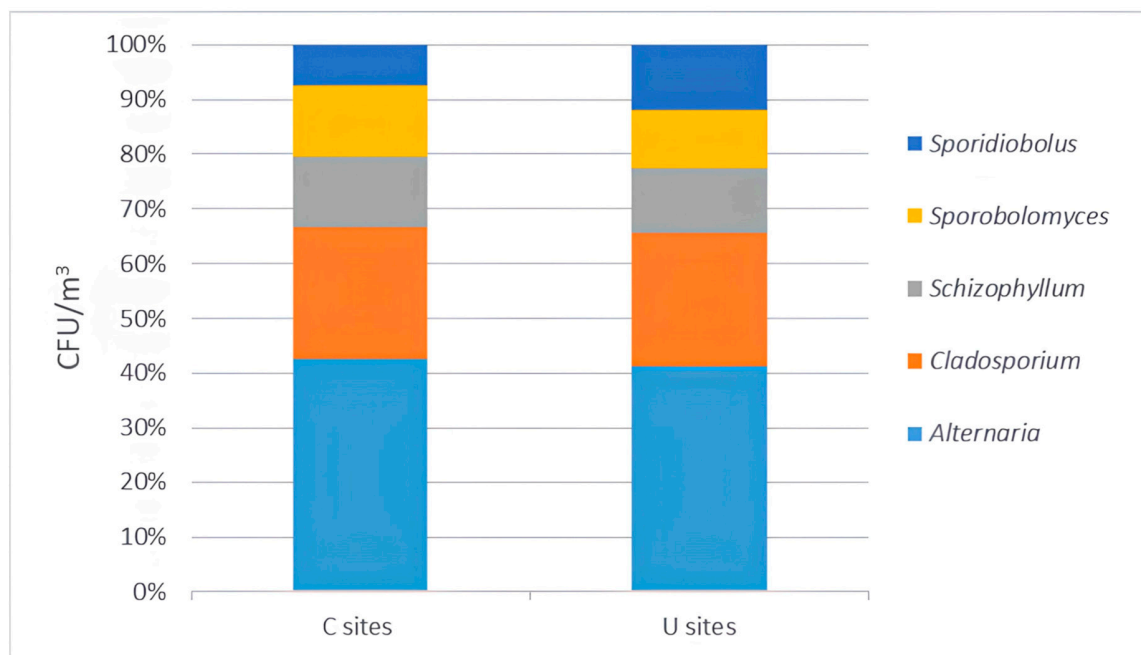

**Supplementary Figure S5:** Concentration of the five most abundant fungal genera collected from the two analyzed sites (C = the top central area of the bridges; U = under the bridges along the side walk) at each pedestrian bridge.

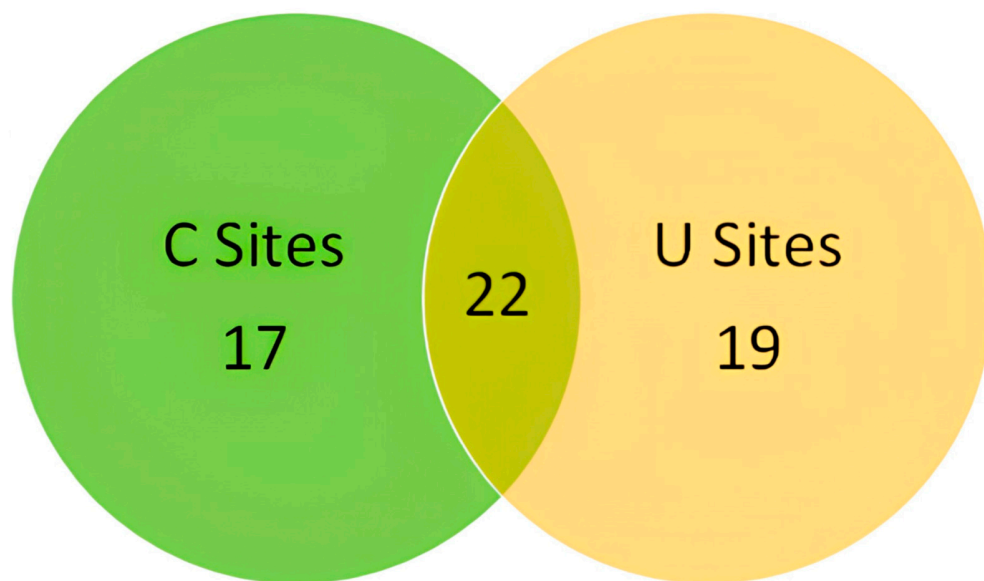

**Supplementary Figure S6:** Total number of fungal genera shared by both sites (C = the top central area of the bridges; U = under the bridges along the side walk) selected for each bridge.

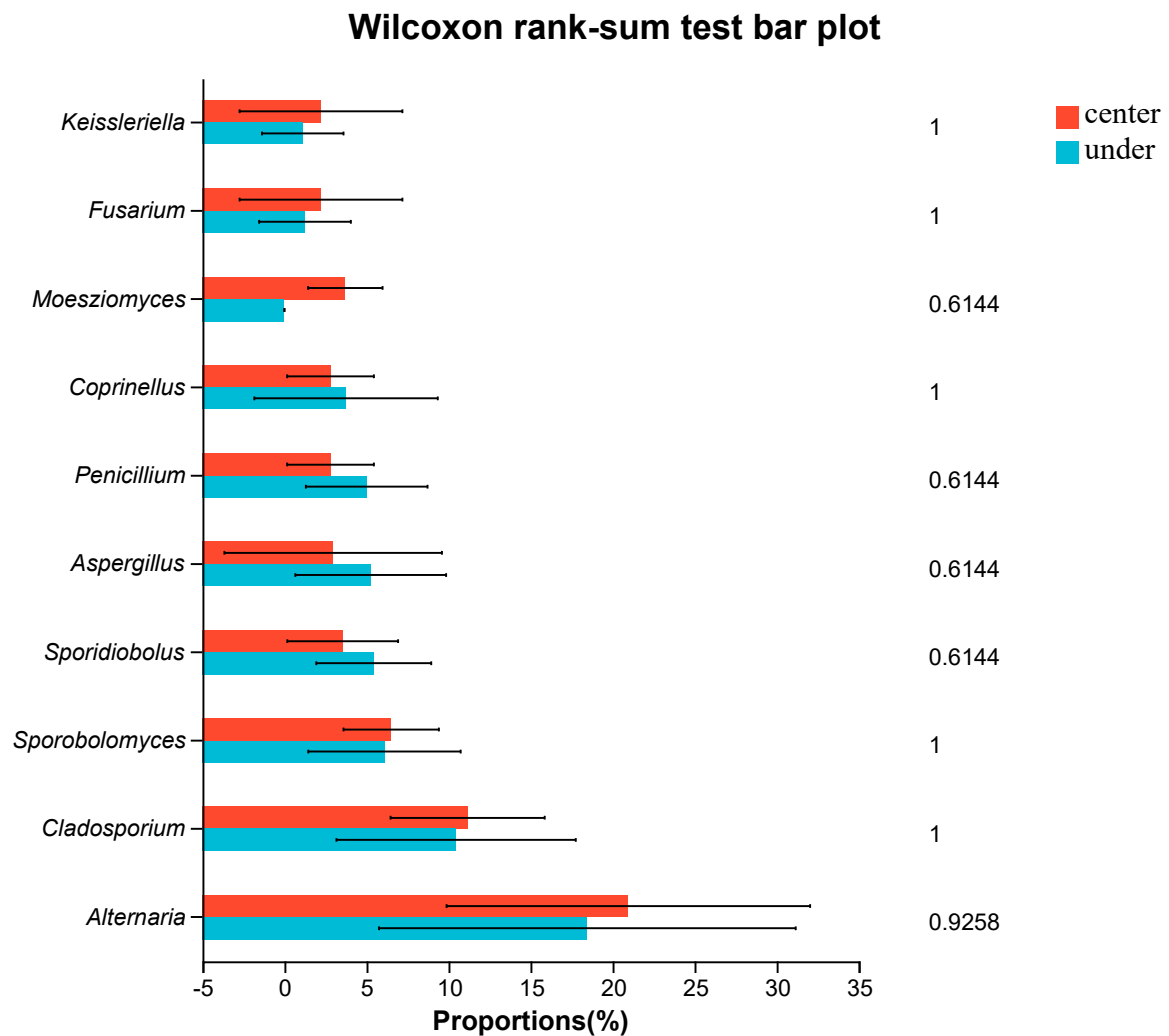

**Supplementary Figure S7:** Variation of ten most abundant fungal genera in the two sites at the center and under the investigated bridges, based on Wilcoxon rank-sum test. Error bars represent SEM.
